# Supplementary material
Source: PubMed Central journal article supplement (PMC5646357)
Supplement: NIHMS841673-supplement-Tables.pdf [file NIHMS841673-supplement-Tables.pdf]

## Supplementary Online Content

Zissimopoulos JM, Barthold D, Brinton RD, Joyce G. Sex and race differences in the association between statin use and incidence of Alzheimer disease. *JAMA Neurol*. doi:10.1001/jamaneurol.2016.3783

**eTable 1.** Hazard Ratios (With *P* Values) of AD Incidence Associated With High Exposure to Statins in 2006-2008, Relative to Those With No Use 2006-2012

**eTable 2.** Hazard Ratios (With *P* Values) of AD Incidence Associated With High Statin Exposure, Relative to Low Exposure, in Sample Restricted to Individuals Observed 2006-2013

**eTable 3.** Hazard Ratios (With *P* Values) of AD Incidence Associated With High Statin Exposure, Relative to Low Exposure, in Sample Restricted to Users in 50th Percentile or Higher

**eTable 4.** Hazard Ratios (With *P* values) of AD Incidence in Years 2012-2013 Only, Associated With High Statin Exposure in 2006-2008, Relative to Low Exposure

**eTable 5.** Hazard Ratios (With *P* Values) of AD Incidence Associated With High Statin Exposure for Different Thresholds Defining High Statin Exposure, Relative to Low Exposures

This supplementary material has been provided by the authors to give readers additional information about their work.

**eTable 1: Hazard Ratios (With *P* Values) of AD Incidence Associated With High Exposure to Statins in 2006-2008, Relative to Those With No Use 2006-2012**

|                     | Female  |         |          |         | Male    |         |          |         |
|---------------------|---------|---------|----------|---------|---------|---------|----------|---------|
|                     | All     | White   | Hispanic | Black   | All     | White   | Hispanic | Black   |
| <b>All</b>          | 0.793   | 0.789   | 0.821    | 0.817   | 0.786   | 0.777   | 0.870    | 0.806   |
|                     | p<0.001 | p<0.001 | p<0.001  | p<0.001 | p<0.001 | p<0.001 | p=0.086  | p=0.015 |
| <b>Simvastatin</b>  | 0.800   | 0.801   | 0.827    | 0.769   | 0.812   | 0.797   | 0.879    | 0.887   |
|                     | p<0.001 | p<0.001 | p<0.001  | p<0.001 | p<0.001 | p<0.001 | p=0.230  | p=0.303 |
| <b>Atorvastatin</b> | 0.788   | 0.784   | 0.792    | 0.863   | 0.780   | 0.773   | 0.836    | 0.816   |
|                     | p<0.001 | p<0.001 | p=0.003  | p=0.043 | p<0.001 | p<0.001 | p=0.150  | p=0.146 |
| <b>Pravastatin</b>  | 0.753   | 0.745   | 0.746    | 0.911   | 0.741   | 0.744   | 0.639    | 0.862   |
|                     | p<0.001 | p<0.001 | p=0.103  | p=0.573 | p<0.001 | p=0.001 | p=0.212  | p=0.644 |
| <b>Rosuvastatin</b> | 0.770   | 0.723   | 1.024    | 0.796   | 0.693   | 0.630   | 1.162    | 1.008   |
|                     | p<0.001 | p<0.001 | p=0.862  | p=0.225 | p<0.001 | p<0.001 | p=0.503  | p=0.980 |

Hazard ratios, depicting relative risk of AD incidence during 2009-2013 for those with any exposure to statins, compared to no exposure. Individuals with high statin exposure are those with at least two days of filled prescriptions in the 50<sup>th</sup> percentile or higher of days of use per year in at least 1 of the 3 years from 2006 to 2008. The comparison groups did not use statins from 2006 to 2012.

**eTable 2: Hazard Ratios (With *P* Values) of AD Incidence Associated With High Statin Exposure, Relative to Low Exposure, in Sample Restricted to Individuals Observed 2006-2013**

|                     | Female  |         |          |         | Male    |         |          |         |
|---------------------|---------|---------|----------|---------|---------|---------|----------|---------|
|                     | All     | White   | Hispanic | Black   | All     | White   | Hispanic | Black   |
| <b>All</b>          | 0.863   | 0.867   | 0.928    | 0.817   | 0.840   | 0.839   | 0.681    | 0.958   |
|                     | p<0.001 | p<0.001 | p=0.327  | p=0.004 | p<0.001 | p<0.001 | p=0.003  | p=0.757 |
| <b>Simvastatin</b>  | 0.864   | 0.871   | 0.870    | 0.809   | 0.868   | 0.896   | 0.723    | 0.801   |
|                     | p<0.001 | p<0.001 | p=0.210  | p=0.047 | p=0.007 | p=0.059 | p=0.073  | p=0.307 |
| <b>Atorvastatin</b> | 0.825   | 0.836   | 0.874    | 0.842   | 0.820   | 0.815   | 0.676    | 0.867   |
|                     | p<0.001 | p<0.001 | p=0.307  | p=0.134 | p<0.001 | p=0.001 | p=0.071  | p=0.521 |
| <b>Pravastatin</b>  | 0.835   | 0.797   | 0.963    | 0.892   | 0.782   | 0.821   | 0.628    | 0.751   |
|                     | p=0.032 | p=0.016 | p=0.893  | p=0.713 | p=0.057 | p=0.157 | p=0.386  | p=0.642 |
| <b>Rosuvastatin</b> | 0.901   | 0.900   | 1.393    | 0.654   | 0.805   | 0.821   | 0.476    | 2.740   |
|                     | p=0.263 | p=0.333 | p=0.167  | p=0.273 | p=0.179 | p=0.274 | p=0.218  | p=0.118 |

Hazard ratios, depicting relative risk of AD incidence during 2009-2013 for those with high exposure to statins, compared to low exposure. Individuals with high statin exposure are those with days of filled prescriptions in the 50<sup>th</sup> percentile or higher of use per year in at least 2 of the 3 years from 2006 to 2008. The low exposure group used the designated statin, but for fewer days, or later in the sample period.

**eTable 3: Hazard Ratios (With *P* Values) of AD Incidence Associated With High Statin Exposure, Relative to Low Exposure, in Sample Restricted to Users in 50th Percentile or Higher**

|                     | Female  |         |          |         | Male    |         |          |         |
|---------------------|---------|---------|----------|---------|---------|---------|----------|---------|
|                     | All     | White   | Hispanic | Black   | All     | White   | Hispanic | Black   |
| <b>All</b>          | 0.834   | 0.847   | 0.803    | 0.773   | 0.877   | 0.892   | 0.680    | 0.857   |
|                     | p<0.001 | p<0.001 | p=0.002  | p<0.001 | p<0.001 | p=0.001 | p=0.001  | p=0.201 |
| <b>Simvastatin</b>  | 0.836   | 0.860   | 0.724    | 0.771   | 0.898   | 0.921   | 0.731    | 0.748   |
|                     | p<0.001 | p<0.001 | p=0.002  | p=0.005 | p=0.019 | p=0.111 | p=0.053  | p=0.103 |
| <b>Atorvastatin</b> | 0.835   | 0.876   | 0.629    | 0.739   | 0.969   | 0.968   | 0.682    | 1.080   |
|                     | p<0.001 | p=0.002 | p=0.002  | p=0.010 | p=0.599 | p=0.625 | p=0.110  | p=0.759 |
| <b>Pravastatin</b>  | 0.882   | 0.888   | 0.841    | 0.666   | 0.803   | 0.856   | 0.672    | 0.707   |
|                     | p=0.101 | p=0.160 | p=0.552  | p=0.171 | p=0.065 | p=0.224 | p=0.424  | p=0.531 |
| <b>Rosuvastatin</b> | 0.850   | 0.837   | 1.053    | 0.649   | 0.900   | 0.882   | 0.847    | 2.319   |
|                     | p=0.067 | p=0.087 | p=0.816  | p=0.203 | p=0.446 | p=0.427 | p=0.658  | p=0.227 |

Hazard ratios, depicting relative risk of AD incidence during 2009-2013 for those with high exposure to statins, compared to low exposure. Individuals with high statin exposure are those with days of filled prescriptions in the 50<sup>th</sup> percentile or higher of days of use per year in at least 2 of the 3 years from 2006 to 2008. The low exposure group used the same quantity of the same statin, in 2009, 2010, 2011, or 2012.

**eTable 4: Hazard Ratios (With *P* Values) of AD Incidence in Years 2012-2013 Only, Associated With High Statin Exposure in 2006-2008, Relative to Low Exposure**

|                     | <b>Female</b> | <b>Male</b> |
|---------------------|---------------|-------------|
|                     | <b>All</b>    | <b>All</b>  |
| <b>All</b>          | 0.866         | 0.901       |
|                     | p<0.001       | p=0.037     |
| <b>Simvastatin</b>  | 0.893         | 0.907       |
|                     | p=0.023       | p=0.191     |
| <b>Atorvastatin</b> | 0.810         | 0.949       |
|                     | p<0.001       | p=0.494     |
| <b>Pravastatin</b>  | 0.720         | 0.804       |
|                     | p=0.013       | p=0.238     |
| <b>Rosuvastatin</b> | 0.754         | 0.636       |
|                     | p=0.055       | p=0.103     |

Hazard ratios, depicting relative risk of AD incidence during 2012-2013 for those with high exposure to statins, compared to low exposure. Individuals with high statin exposure are those with days of filled prescriptions in the 50<sup>th</sup> percentile or higher of days of use per year in at least 2 of the 3 years from 2006 to 2008. The low exposure group used the designated statin, but for fewer days, or later in the sample period. Sample restricted to those observed 2006-2012.

**eTable 5: Hazard Ratios (With *P* Values) of AD Incidence Associated With High Statin Exposure for Different Thresholds Defining High Statin Exposure, Relative to Low Exposures**

|                     | Female  |         |          |         | Male    |         |          |         |
|---------------------|---------|---------|----------|---------|---------|---------|----------|---------|
|                     | All     | White   | Hispanic | Black   | All     | White   | Hispanic | Black   |
| <b>All Statins</b>  |         |         |          |         |         |         |          |         |
| <b>25th %</b>       | 0.896   | 0.911   | 0.942    | 0.786   | 0.897   | 0.902   | 0.884    | 0.856   |
|                     | p<0.001 | p<0.001 | p=0.316  | p=0.708 | p<0.001 | p=0.002 | p=0.188  | p=0.136 |
| <b>50th %</b>       | 0.854   | 0.856   | 0.880    | 0.817   | 0.875   | 0.891   | 0.710    | 0.858   |
|                     | p<0.001 | p<0.001 | p=0.059  | p<0.001 | p<0.001 | p<0.001 | p=0.001  | p=0.176 |
| <b>75th %</b>       | 0.830   | 0.832   | 0.886    | 0.795   | 0.805   | 0.825   | 0.605    | 0.823   |
|                     | p<0.001 | p<0.001 | p=0.128  | p=0.001 | p<0.001 | p<0.001 | p<0.001  | p=0.134 |
| <b>Simvastatin</b>  |         |         |          |         |         |         |          |         |
| <b>25th %</b>       | 0.873   | 0.881   | 0.886    | 0.794   | 0.893   | 0.901   | 0.811    | 0.866   |
|                     | p<0.001 | p<0.001 | p=0.103  | p=0.001 | p=0.002 | p=0.013 | p=0.061  | p=0.270 |
| <b>50th %</b>       | 0.850   | 0.862   | 0.820    | 0.782   | 0.867   | 0.896   | 0.670    | 0.768   |
|                     | p<0.001 | p<0.001 | p=0.043  | p=0.005 | p=0.001 | p=0.024 | p=0.009  | p=0.122 |
| <b>75th %</b>       | 0.825   | 0.839   | 0.798    | 0.747   | 0.807   | 0.831   | 0.507    | 0.777   |
|                     | p<0.001 | p<0.001 | p=0.066  | p=0.008 | p<0.001 | p=0.001 | p=0.001  | p=0.221 |
| <b>Atorvastatin</b> |         |         |          |         |         |         |          |         |
| <b>25th %</b>       | 0.890   | 0.902   | 0.936    | 0.883   | 0.936   | 0.946   | 0.846    | 0.892   |
|                     | p<0.001 | p=0.001 | p=0.474  | p=0.119 | p=0.127 | p=0.258 | p=0.237  | p=0.492 |
| <b>50th %</b>       | 0.824   | 0.835   | 0.759    | 0.810   | 0.901   | 0.922   | 0.612    | 0.915   |
|                     | p<0.001 | p<0.001 | p=0.024  | p=0.030 | p=0.024 | p=0.113 | p=0.009  | p=0.640 |
| <b>75th %</b>       | 0.794   | 0.807   | 0.724    | 0.798   | 0.821   | 0.862   | 0.462    | 0.852   |
|                     | p<0.001 | p<0.001 | p=0.028  | p=0.055 | p<0.001 | p=0.010 | p=0.002  | p=0.481 |
| <b>Pravastatin</b>  |         |         |          |         |         |         |          |         |
| <b>25th %</b>       | 0.862   | 0.860   | 0.919    | 0.868   | 0.875   | 0.900   | 0.905    | 0.804   |
|                     | p=0.011 | p=0.021 | p=0.677  | p=0.479 | p=0.146 | p=0.293 | p=0.785  | p=0.569 |
| <b>50th %</b>       | 0.821   | 0.816   | 0.818    | 0.756   | 0.779   | 0.823   | 0.748    | 0.702   |
|                     | p=0.006 | p=0.011 | p=0.460  | p=0.327 | p=0.026 | p=0.106 | p=0.539  | p=0.498 |
| <b>75th %</b>       | 0.783   | 0.772   | 0.940    | 0.710   | 0.683   | 0.720   | 0.683    | 0.543   |

|                     |             |             |         |             |             |             |         |             |
|---------------------|-------------|-------------|---------|-------------|-------------|-------------|---------|-------------|
|                     | p=0.00<br>5 | p=0.00<br>7 | p=0.845 | p=0.37<br>3 | p=0.00<br>5 | p=0.02<br>3 | p=0.528 | p=0.40<br>0 |
| <b>Rosuvastatin</b> |             |             |         |             |             |             |         |             |
| <b>25th %</b>       | 0.921       | 0.934       | 0.950   | 0.790       | 0.852       | 0.851       | 0.821   | 1.149       |
|                     | p=0.16<br>7 | p=0.33<br>0 | p=0.736 | p=0.24<br>3 | p=0.10<br>2 | p=0.15<br>8 | p=0.444 | p=0.73<br>9 |
| <b>50th %</b>       | 0.828       | 0.810       | 1.172   | 0.671       | 0.898       | 0.879       | 0.998   | 1.530       |
|                     | p=0.02<br>3 | p=0.03<br>1 | p=0.440 | p=0.21<br>7 | p=0.40<br>4 | p=0.38<br>1 | p=0.996 | p=0.42<br>3 |
| <b>75th %</b>       | 0.757       | 0.762       | 1.146   | 0.337       | 0.827       | 0.840       | 1.081   | 1.134       |
|                     | p=0.00<br>9 | p=0.02<br>5 | p=0.623 | p=0.06<br>2 | p=0.23<br>3 | p=0.32<br>7 | p=0.858 | p=0.86<br>4 |

Hazard ratios, depicting relative risk of AD incidence during 2009-2013 for those with the designated exposure to statins, compared to lower exposure. Individuals with high statin exposure are those with days of filled prescriptions in the 25<sup>th</sup>, 50<sup>th</sup>, or 75<sup>th</sup> percentile of higher of days of use per year in at least 2 of the 3 years from 2006 to 2008. The low exposure group used the designated statin, but for fewer days, or later in the sample period.
